# Supplementary material
Source: Springer Nature journal article supplement (https://www.springermedizin.de/resource/supplementary/12887_2005_99_MOESM7_ESM.pdf/9477266)
Supplement: MOESM7 [file 9477266]

### Haemoglobin < 5 g/dL

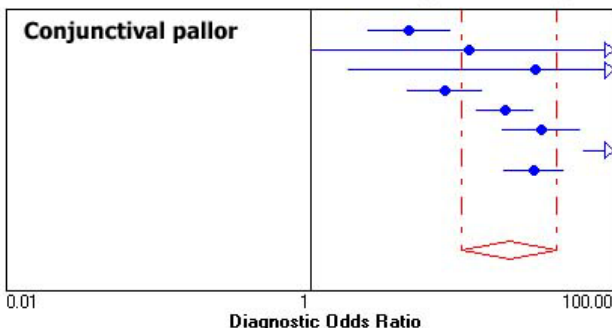

| Study        | Diagnostic OR (95% CI)  |
|--------------|-------------------------|
| Desai 2002   | 4.53 (2.43 - 8.44)      |
| Getaneh 2000 | 11.22 (1.00 - 125.41)   |
| Kalter 1997  | 30.60 (1.78 - 525.30)   |
| Luby 1995    | 7.76 (4.36 - 13.82)     |
| Muhe 2000    | 19.37 (12.60 - 29.79)   |
| Zucker 1997a | 33.56 (18.33 - 61.45)   |
| Zucker 1997b | 186.63 (64.16 - 542.90) |
| Zucker 1997c | 29.94 (18.99 - 47.20)   |

Random Effects Model  
 Pooled Diagnostic Odds Ratio = 20.62 (10.07 to 42.24)  
 Cochran-Q = 55.06; df = 7 (p = 0.0000)

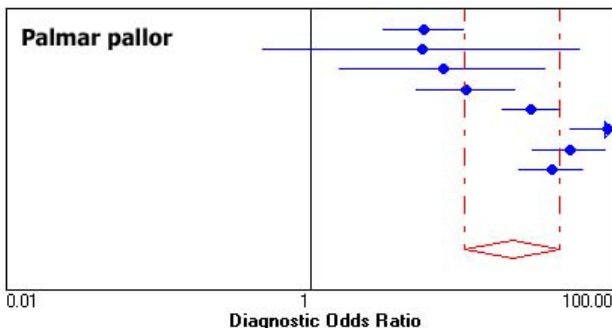

| Study        | Diagnostic OR (95% CI) |
|--------------|------------------------|
| Desai 2002   | 5.61 (3.02 - 10.43)    |
| Getaneh 2000 | 5.47 (0.49 - 60.78)    |
| Kalter 1997  | 7.51 (1.58 - 35.79)    |
| Luby 1995    | 10.70 (5.00 - 22.91)   |
| Muhe 2000    | 28.56 (18.38 - 44.38)  |
| Zucker 1997a | 90.98 (51.80 - 159.80) |
| Zucker 1997b | 51.40 (29.38 - 89.91)  |
| Zucker 1997c | 39.00 (23.81 - 63.87)  |

Random Effects Model  
 Pooled Diagnostic Odds Ratio = 21.62 (10.54 to 44.37)  
 Cochran-Q = 62.87; df = 7 (p = 0.0000)

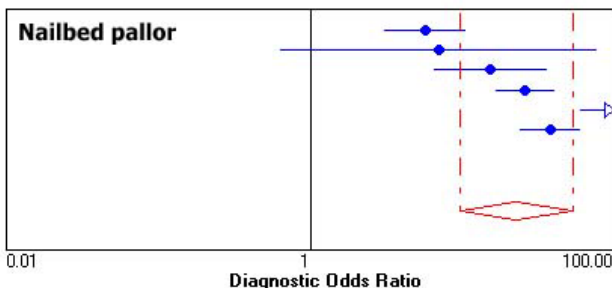

| Study        | Diagnostic OR (95% CI)  |
|--------------|-------------------------|
| Desai 2002   | 5.74 (3.09 - 10.67)     |
| Getaneh 2000 | 7.06 (0.63 - 78.58)     |
| Luby 1995    | 15.53 (6.58 - 36.63)    |
| Muhe 2000    | 26.38 (16.99 - 40.94)   |
| Zucker 1997a | 107.76 (60.48 - 192.00) |
| Zucker 1997b | 38.40 (24.29 - 60.71)   |

Random Effects Model  
 Pooled Diagnostic Odds Ratio = 22.98 (9.78 to 54.02)  
 Cochran-Q = 52.27; df = 5 (p = 0.0000)
